# Supplementary material for: Fluorescence‐based discrimination of breast cancer cells by direct exposure to 5‐aminolevulinic acid
Source: PubMed Central journal article supplement (PMC6746108; doi:10.1002/cam4.2466), 2019-08-05
Supplement: CAM4-8-5524-s002.pdf [file CAM4-8-5524-s002.pdf]

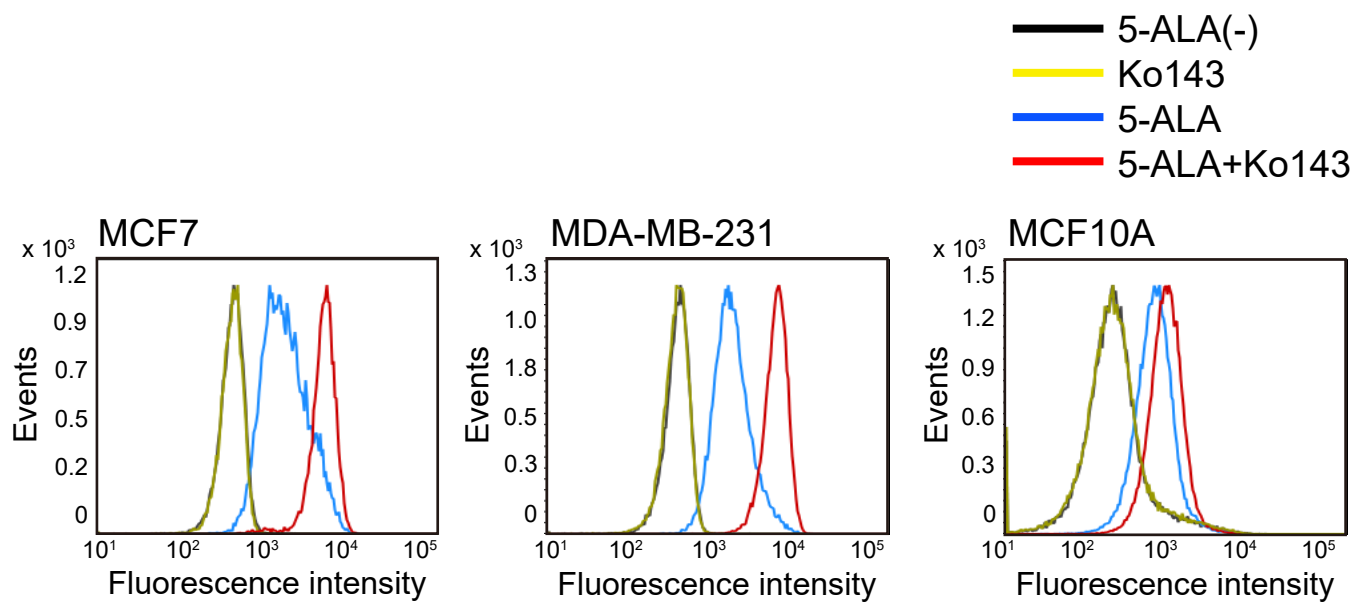

Fig. S2
